# Supplementary material for: Improving the Extraction of Catechins of Green Tea (Camellia sinensis) by Subcritical Water Extraction (SWE) Combined with Pulsed Electric Field (PEF) or Intense Pulsed Light (IPL) Pretreatment
Source: MDPI journal article supplement (doi:10.3390/foods10123092), 2021-12-13
Supplement: s1 [file s1]

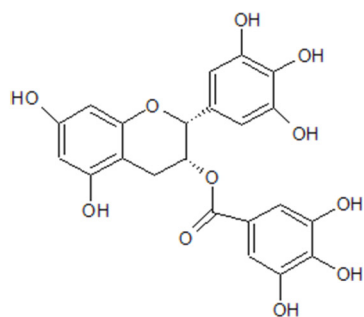

(-)-epigallocatechin gallate (EGCG)

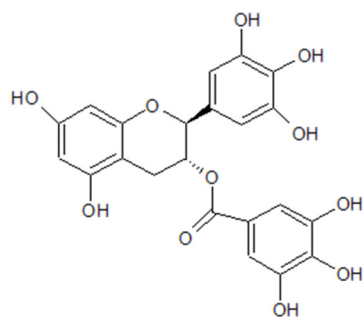

(-)-gallocatechin gallate (GCG)

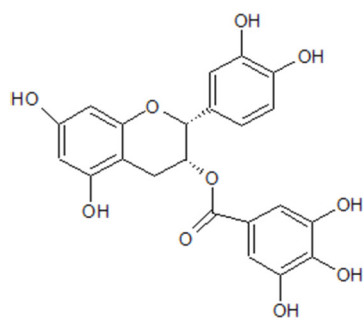

(-)-epicatechin gallate (ECG)

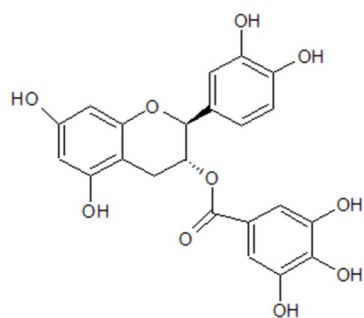

(-)-catechin gallate (CG)

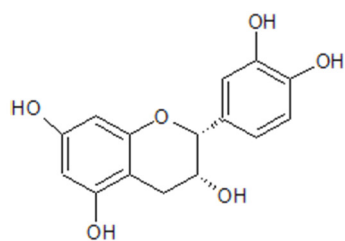

(-)-epicatechin (EC)

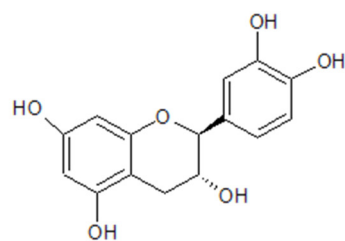

(-)-catechin (Ct)

**Figure S1.** Chemical structure of tea catechins.

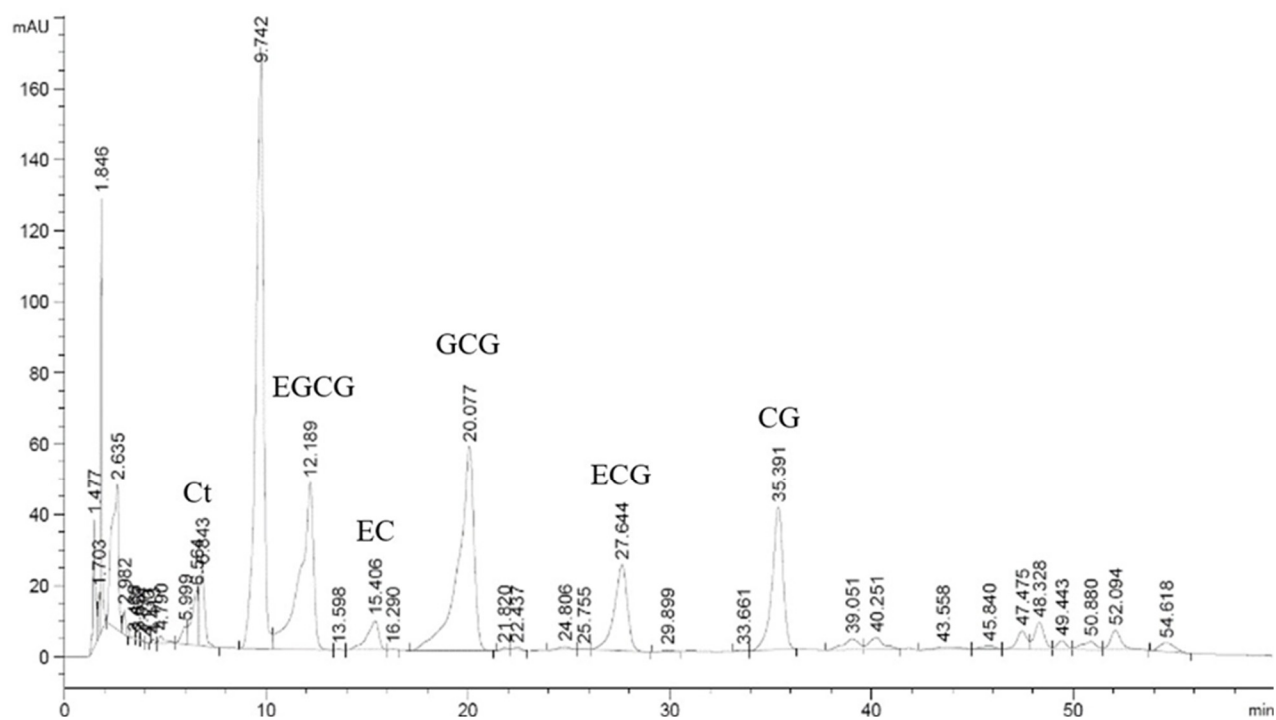

**Figure S2.** HPLC chromatogram of green tea leaves extract by SWE.
